# Supplementary material for: Repeat‐associated non‐AUG translation in C9orf72‐ALS/FTD is driven by neuronal excitation and stress
Source: PubMed Central journal article supplement (PMC6365928; doi:10.15252/emmm.201809423), 2019-01-07
Supplement: EMMM-11-e9423-s001.pdf [file EMMM-11-e9423-s001.pdf]

## Table of Contents - Appendix Table S1

|                                                                         |          |
|-------------------------------------------------------------------------|----------|
| <b>Figure 1</b>                                                         | <b>2</b> |
| 1B DPR level (relative to GA)                                           | 2        |
| 1D DPR positive cells (%)                                               | 2        |
| 1D Fluorescent Intensity                                                | 2        |
| <b>Figure EV1</b>                                                       | <b>3</b> |
| 1B DPR level (relative to GA)                                           | 3        |
| 1D DPR positive cells (%)                                               | 3        |
| 1D Fluorescent Intensity                                                | 4        |
| <b>Figure 2</b>                                                         | <b>5</b> |
| 2A (SSP dose response curve)                                            | 5        |
| 2B Western Blot DPR level                                               | 5        |
| 2C NSC34 Fluorescent Intensity                                          | 5        |
| 2C Cortical Neuron Fluorescent Intensity                                | 6        |
| 2D iMN Fluorescent Intensity                                            | 6        |
| <b>Figure EV2</b>                                                       | <b>7</b> |
| <b>Figure 3</b>                                                         | <b>7</b> |
| 3B Cortical Neuron Fluorescent Intensity                                | 7        |
| 3B iMN Fluorescent Intensity                                            | 8        |
| <b>Figure 4</b>                                                         | <b>8</b> |
| 4C Fluorescent Intensity                                                | 8        |
| <b>Figure 5/Figure EV5</b>                                              | <b>8</b> |
| Figure 5A and Figure EV5B p-eif2 $\alpha$ /eif2 $\alpha$ protein levels | 8        |
| Figure 5A and Figure EV5B PERK protein levels                           | 9        |
| Figure 5A and Figure EV5B ATF4 protein levels                           | 9        |
| <b>Figure 6</b>                                                         | <b>9</b> |
| Figure 6A NSC34 RAN Inhibitor Fluorescent Intensity                     | 9        |
| Figure 6B Cortical Neuron RAN Inhibitor Fluorescent Intensity           | 10       |

| <b>Figure 1</b>                      |            |                 |              |                    |
|--------------------------------------|------------|-----------------|--------------|--------------------|
| <b>1B DPR level (relative to GA)</b> |            |                 |              |                    |
| Uncorrected Fisher's LSD             | Mean Diff. | Significant?    | Summary      | Individual P Value |
| GA vs. GP                            | 0.2732     | No              | ns           | 0.1258             |
| GA vs. GR                            | 0.6552     | Yes             | ***          | 0.0009             |
| <b>1D DPR positive cells (%)</b>     |            |                 |              |                    |
| <b>A10</b>                           |            |                 |              |                    |
| Dunnett's multiple comparison        | Mean Diff. | 95% CI of diff. | Significant? | Summary            |
| <b>GA</b>                            |            |                 |              |                    |
| HEK vs. NSC34                        | 21.35      | 6.186 to 36.51  | Yes          | **                 |
| HEK vs. Neurons                      | 25.43      | 10.27 to 40.59  | Yes          | ***                |
| <b>GP</b>                            |            |                 |              |                    |
| HEK vs. NSC34                        | 25.44      | 10.28 to 40.60  | Yes          | ***                |
| HEK vs. Neurons                      | 29.67      | 14.51 to 44.83  | Yes          | ****               |
| <b>GR</b>                            |            |                 |              |                    |
| HEK vs. NSC34                        | 26.38      | 11.22 to 41.54  | Yes          | ***                |
| HEK vs. Neurons                      | 29.27      | 14.11 to 44.43  | Yes          | ****               |
| <b>1D Fluorescent Intensity</b>      |            |                 |              |                    |
| Uncorrected Fisher's LSD             | Mean Diff. | Significant?    | Summary      | Individual P Value |
| HEK:GA vs. HEK:GP                    | 0.251      | Yes             | *            | 0.0281             |
| HEK:GA vs. HEK:GR                    | 0.512      | Yes             | ****         | < 0.0001           |
| HEK:GA vs. NSC34:GA                  | 0.615      | Yes             | ****         | < 0.0001           |
| HEK:GA vs. NSC34:GP                  | 0.749      | Yes             | ****         | < 0.0001           |
| HEK:GA vs. NSC34:GR                  | 0.837      | Yes             | ****         | < 0.0001           |
| HEK:GA vs. Neurons:GA                | 0.721      | Yes             | ****         | < 0.0001           |
| HEK:GA vs. Neurons:GP                | 0.812      | Yes             | ****         | < 0.0001           |
| HEK:GA vs. Neurons:GR                | 0.878      | Yes             | ****         | < 0.0001           |
| HEK:GP vs. HEK:GR                    | 0.261      | Yes             | *            | 0.0225             |
| HEK:GP vs. NSC34:GA                  | 0.364      | Yes             | **           | 0.0017             |
| HEK:GP vs. NSC34:GP                  | 0.498      | Yes             | ****         | < 0.0001           |
| HEK:GP vs. NSC34:GR                  | 0.586      | Yes             | ****         | < 0.0001           |
| HEK:GP vs. Neurons:GA                | 0.47       | Yes             | ****         | < 0.0001           |

|                           |        |     |      |          |
|---------------------------|--------|-----|------|----------|
| HEK:GP vs. Neurons:GP     | 0.561  | Yes | **** | < 0.0001 |
| HEK:GP vs. Neurons:GR     | 0.627  | Yes | **** | < 0.0001 |
| HEK:GR vs. NSC34:GA       | 0.103  | No  | ns   | 0.3615   |
| HEK:GR vs. NSC34:GP       | 0.237  | Yes | *    | 0.0378   |
| HEK:GR vs. NSC34:GR       | 0.325  | Yes | **   | 0.0049   |
| HEK:GR vs. Neurons:GA     | 0.209  | No  | ns   | 0.0662   |
| HEK:GR vs. Neurons:GP     | 0.3    | Yes | **   | 0.0091   |
| HEK:GR vs. Neurons:GR     | 0.366  | Yes | **   | 0.0016   |
| NSC34:GA vs. NSC34:GP     | 0.134  | No  | ns   | 0.236    |
| NSC34:GA vs. NSC34:GR     | 0.222  | No  | ns   | 0.0513   |
| NSC34:GA vs. Neurons:GA   | 0.106  | No  | ns   | 0.3478   |
| NSC34:GA vs. Neurons:GP   | 0.197  | No  | ns   | 0.083    |
| NSC34:GA vs. Neurons:GR   | 0.263  | Yes | *    | 0.0216   |
| NSC34:GP vs. NSC34:GR     | 0.088  | No  | ns   | 0.4353   |
| NSC34:GP vs. Neurons:GA   | -0.028 | No  | ns   | 0.8036   |
| NSC34:GP vs. Neurons:GP   | 0.063  | No  | ns   | 0.5761   |
| NSC34:GP vs. Neurons:GR   | 0.129  | No  | ns   | 0.2538   |
| NSC34:GR vs. Neurons:GA   | -0.116 | No  | ns   | 0.3044   |
| NSC34:GR vs. Neurons:GP   | -0.025 | No  | ns   | 0.8243   |
| NSC34:GR vs. Neurons:GR   | 0.041  | No  | ns   | 0.7158   |
| Neurons:GA vs. Neurons:GP | 0.091  | No  | ns   | 0.4199   |
| Neurons:GA vs. Neurons:GR | 0.157  | No  | ns   | 0.1657   |
| Neurons:GP vs. Neurons:GR | 0.066  | No  | ns   | 0.5581   |

|                                      |            |                 |            |                    |  |
|--------------------------------------|------------|-----------------|------------|--------------------|--|
| <b>Figure EV1</b>                    |            |                 |            |                    |  |
| <b>1B DPR level (relative to GA)</b> |            |                 |            |                    |  |
| Uncorrected Fisher's LSD             | Mean Diff. | Significant?    | Summary    | Individual P Value |  |
| PA vs. PG                            | -0.76      | No              | ns         | 0.1268             |  |
| PA vs. PR                            | -0.27      | No              | ns         | 0.5708             |  |
| <b>1D DPR positive cells (%)</b>     |            |                 |            |                    |  |
| Dunnett's multiple comparisons tes   | Mean Diff. | 95% CI of diff. | Significan | Summary            |  |
| PA                                   |            |                 |            |                    |  |
| HEK vs. NSC34                        | 28.87      | 12.00 to 45.74  | Yes        | ***                |  |
| HEK vs. Neurons                      | 32.72      | 15.85 to 49.59  | Yes        | ****               |  |
| PG                                   |            |                 |            |                    |  |
| HEK vs. NSC34                        | 35.61      | 18.74 to 52.48  | Yes        | ****               |  |

|                                 |            |                |         |                    |  |
|---------------------------------|------------|----------------|---------|--------------------|--|
| HEK vs. Neurons                 | 39.22      | 22.35 to 56.09 | Yes     | ****               |  |
| PR                              |            |                |         |                    |  |
| HEK vs. NSC34                   | 29.22      | 12.35 to 46.09 | Yes     | ***                |  |
| HEK vs. Neurons                 | 32.17      | 15.30 to 49.04 | Yes     | ****               |  |
| <b>1D Fluorescent Intensity</b> |            |                |         |                    |  |
| Uncorrected Fisher's LSD        | Mean Diff. | Significant?   | Summary | Individual P Value |  |
| HEK:PA vs. HEK:PG               | -0.272     | No             | ns      | 0.2723             |  |
| HEK:PA vs. HEK:PR               | -0.01      | No             | ns      | 0.9677             |  |
| HEK:PA vs. NSC34:PA             | 0.601      | Yes            | *       | 0.0168             |  |
| HEK:PA vs. NSC34:PG             | 0.534      | Yes            | *       | 0.0329             |  |
| HEK:PA vs. NSC34:PR             | 0.636      | Yes            | *       | 0.0116             |  |
| HEK:PA vs. Neurons:PA           | 0.796      | Yes            | **      | 0.0018             |  |
| HEK:PA vs. Neurons:PG           | 0.661      | Yes            | **      | 0.0088             |  |
| HEK:PA vs. Neurons:PR           | 0.723      | Yes            | **      | 0.0043             |  |
| HEK:PG vs. HEK:PR               | 0.262      | No             | ns      | 0.2902             |  |
| A37                             |            |                |         |                    |  |
| HEK:PG vs. NSC34:PA             | 0.873      | Yes            | ***     | 0.0007             |  |
| HEK:PG vs. NSC34:PG             | 0.806      | Yes            | **      | 0.0016             |  |
| HEK:PG vs. NSC34:PR             | 0.908      | Yes            | ***     | 0.0004             |  |
| HEK:PG vs. Neurons:PA           | 1.068      | Yes            | ****    | < 0.0001           |  |
| HEK:PG vs. Neurons:PG           | 0.933      | Yes            | ***     | 0.0003             |  |
| HEK:PG vs. Neurons:PR           | 0.995      | Yes            | ***     | 0.0001             |  |
| HEK:PR vs. NSC34:PA             | 0.611      | Yes            | *       | 0.0151             |  |
| HEK:PR vs. NSC34:PG             | 0.544      | Yes            | *       | 0.0299             |  |
| HEK:PR vs. NSC34:PR             | 0.646      | Yes            | *       | 0.0104             |  |
| HEK:PR vs. Neurons:PA           | 0.806      | Yes            | **      | 0.0016             |  |
| HEK:PR vs. Neurons:PG           | 0.671      | Yes            | **      | 0.0078             |  |
| HEK:PR vs. Neurons:PR           | 0.733      | Yes            | **      | 0.0038             |  |
| NSC34:PA vs. NSC34:PG           | -0.067     | No             | ns      | 0.7861             |  |
| NSC34:PA vs. NSC34:PR           | 0.035      | No             | ns      | 0.8873             |  |
| NSC34:PA vs. Neurons:PA         | 0.195      | No             | ns      | 0.4305             |  |
| NSC34:PA vs. Neurons:PG         | 0.06       | No             | ns      | 0.808              |  |
| NSC34:PA vs. Neurons:PR         | 0.122      | No             | ns      | 0.6214             |  |
| NSC34:PG vs. NSC34:PR           | 0.102      | No             | ns      | 0.6796             |  |
| NSC34:PG vs. Neurons:PA         | 0.262      | No             | ns      | 0.2902             |  |
| NSC34:PG vs. Neurons:PG         | 0.127      | No             | ns      | 0.6072             |  |
| NSC34:PG vs. Neurons:PR         | 0.189      | No             | ns      | 0.4447             |  |

|                           |        |    |    |        |
|---------------------------|--------|----|----|--------|
| NSC34:PR vs. Neurons:PA   | 0.16   | No | ns | 0.5174 |
| NSC34:PR vs. Neurons:PG   | 0.025  | No | ns | 0.9193 |
| NSC34:PR vs. Neurons:PR   | 0.087  | No | ns | 0.7246 |
| Neurons:PA vs. Neurons:PG | -0.135 | No | ns | 0.5848 |
| Neurons:PA vs. Neurons:PR | -0.073 | No | ns | 0.7675 |
| Neurons:PG vs. Neurons:PR | 0.062  | No | ns | 0.8017 |

| <b>Figure 2</b>                       |            |              |         |                    |     |
|---------------------------------------|------------|--------------|---------|--------------------|-----|
| <b>2A (SSP dose response curve)</b>   |            |              |         |                    |     |
| P value                               |            |              |         |                    |     |
| 0.489796                              |            |              |         |                    |     |
| 0.397368                              |            |              |         |                    |     |
| 0.120726                              |            |              |         |                    |     |
| 0.0100101                             |            |              |         |                    |     |
| 0.0027665                             |            |              |         |                    |     |
| 0.00510791                            |            |              |         |                    |     |
| <b>2B Western Blot DPR level</b>      |            |              |         |                    |     |
| Uncorrected Fisher's L                | Mean Diff. | Significant? | Summary | Individual P Value |     |
| CTRL vs. TG                           | -0.9653    | Yes          | **      | 0.0045             |     |
| CTRL vs. Mena                         | -0.9427    | Yes          | **      | 0.0055             |     |
| CTRL vs. SSP                          | -0.6797    | Yes          | *       | 0.0436             |     |
| CTRL vs. Diamide                      | -1.424     | Yes          | ****    | < 0.0001           |     |
| CTRL vs. CytoD                        | -0.8643    | Yes          | *       | 0.0107             |     |
| CTRL vs. MS-275                       | -1.135     | Yes          | ***     | 0.0009             |     |
| CTRL vs. Etoposide                    | -1.364     | Yes          | ****    | < 0.0001           |     |
| CTRL vs. LeptoB                       | -0.7387    | Yes          | *       | 0.0285             |     |
| CTRL vs. HC                           | -1.258     | Yes          | ***     | 0.0003             |     |
| CTRL vs. NaArs                        | -1.025     | Yes          | **      | 0.0026             |     |
| CTRL vs. TM                           | -0.6603    | Yes          | *       | 0.0498             |     |
| CTRL vs. Glut                         | -0.402     | No           | ns      | 0.2299             |     |
| <b>2C NSC34 Fluorescent Intensity</b> |            |              |         |                    |     |
| Uncorrected Fisher's L                | Mean Diff. | Significant? | Summary | Individual P Value |     |
| CTRL vs. TG                           | -0.5336    | No           | ns      | 0.0722             |     |
| CTRL vs. Mena                         | -0.926     | Yes          | **      | 0.0019             |     |
| CTRL vs. SSP                          | -0.8743    | Yes          | **      | 0.0033             |     |
| CTRL vs. Diamide                      | -0.9583    | Yes          | **      | 0.0013             | F35 |

|                    |         |     |      |          |  |
|--------------------|---------|-----|------|----------|--|
| CTRL vs. CytoD     | -0.1551 | No  | ns   | 0.6006   |  |
| CTRL vs. MS 275    | -1.196  | Yes | **** | < 0.0001 |  |
| CTRL vs. Etoposide | -1.288  | Yes | **** | < 0.0001 |  |
| CTRL vs. Lepto B   | -1.071  | Yes | ***  | 0.0003   |  |
| CTRL vs. HC        | -0.791  | Yes | **   | 0.0036   |  |
| CTRL vs. NaArs     | -1.37   | Yes | **** | < 0.0001 |  |
| CTRL vs. TM        | -1.022  | Yes | ***  | 0.0006   |  |
| CTRL vs. Glut      | -0.85   | Yes | **   | 0.0018   |  |

### 2C Cortical Neuron Fluorescent Intensity

| Uncorrected Fisher's L | Mean Diff. | 95% CI of diff.   | Significan | Summary | Individual P Value |
|------------------------|------------|-------------------|------------|---------|--------------------|
| CTRL vs. TG            | -0.455     | -0.9506 to 0.0406 | No         | ns      | 0.0718             |
| CTRL vs. Mena          | -0.811     | -1.307 to -0.3154 | Yes        | **      | 0.0014             |
| CTRL vs. SSP           | -0.6807    | -1.176 to -0.1850 | Yes        | **      | 0.0073             |
| CTRL vs. Diamide       | -0.8013    | -1.297 to -0.3057 | Yes        | **      | 0.0016             |
| CTRL vs. CytoD         | -0.3313    | -0.8270 to 0.1643 | No         | ns      | 0.1893             |
| CTRL vs. MS 275        | -0.8907    | -1.386 to -0.3950 | Yes        | ***     | 0.0005             |
| CTRL vs. Etoposide     | -0.9083    | -1.404 to -0.4127 | Yes        | ***     | 0.0004             |
| CTRL vs. Lepto B       | -0.8963    | -1.392 to -0.4007 | Yes        | ***     | 0.0004             |
| CTRL vs. HC            | -1.237     | -1.733 to -0.7417 | Yes        | ****    | < 0.0001           |
| CTRL vs. NaArs         | -0.6433    | -1.139 to -0.1477 | Yes        | *       | 0.0112             |
| CTRL vs. TM            | -0.674     | -1.170 to -0.1784 | Yes        | **      | 0.0079             |
| CTRL vs. Glut          | -1.671     | -2.166 to -1.175  | Yes        | ****    | < 0.0001           |

### 2D iMN Fluorescent Intensity

| Uncorrected Fisher's L | Mean Diff. | Significant? | Summary | Individual P Value |
|------------------------|------------|--------------|---------|--------------------|
| CTRL vs. TG            | -0.6899    | Yes          | *       | 0.0499             |
| CTRL vs. Mena          | -0.7481    | Yes          | *       | 0.0336             |
| CTRL vs. SSP           | -0.9522    | Yes          | **      | 0.0071             |
| CTRL vs. Diamide       | -1.231     | Yes          | ***     | 0.0006             |
| CTRL vs. CytoD         | -0.1805    | No           | ns      | 0.6059             |
| CTRL vs. MS 275        | -1.075     | Yes          | **      | 0.0024             |
| CTRL vs. Etoposide     | -1.212     | Yes          | ***     | 0.0007             |
| CTRL vs. Lepto B       | -1.352     | Yes          | ***     | 0.0002             |
| CTRL vs. HC            | -1.1       | Yes          | **      | 0.002              |
| CTRL vs. NaArs         | -0.9612    | Yes          | **      | 0.0066             |
| CTRL vs. TM            | -1.103     | Yes          | **      | 0.0019             |

|               |        |     |      |          |  |  |
|---------------|--------|-----|------|----------|--|--|
| CTRL vs. Glut | -1.591 | Yes | **** | < 0.0001 |  |  |
|---------------|--------|-----|------|----------|--|--|

| <b>Figure EV2</b>      |             |               |              |              |                 |                |         |
|------------------------|-------------|---------------|--------------|--------------|-----------------|----------------|---------|
| Dose Response P Values |             |               |              |              |                 |                |         |
| Thapsigargin           | Tunicamycin | Allyl Alcohol | Menadione    | Bromobenzene | Staurosporine   | Cytochalasin D | Diamide |
| P value                | P value     | P value       | P value      | P value      | P value         | P value        | P value |
| 0.79850                | 0.89501     | 0.83076       | 0.02588      | 0.60410      | 0.48980         | 0.69757        | 0.96366 |
| 0.89975                | 0.91302     | 0.05530       | 0.02761      | 0.15765      | 0.39737         | 0.97776        | 0.44257 |
| 0.27209                | 0.65106     | 0.00512       | 0.00112      | 0.02448      | 0.12073         | 0.99662        | 0.08587 |
| 0.00817                | 0.11078     | 0.00200       | 0.00024      | 0.00107      | 0.01001         | 0.93672        | 0.05030 |
| 0.00940                | 0.00663     | 0.00073       | 0.00096      | 0.00890      | 0.00277         | 0.99541        | 0.07009 |
| 0.00562                | 0.02762     | 0.00193       | < 0.0001     | 0.00166      | 0.00511         | 0.66968        | 0.01286 |
| MS-275                 | Etoposide   | Leptomycin B  | Homocysteine | Paraquat     | Sodium Arsenite | H2O2           | KCl     |
| P value                | P value     | P value       | P value      | P value      | P value         | P value        | P value |
| 0.56877                | 0.92861     | 0.35717       | 0.01878      | 0.71362      | 0.66536         | 0.39229        | 0.39085 |
| 0.33083                | 0.67932     | 0.03656       | 0.01497      | 0.38362      | 0.13143         | 0.10127        | 0.45610 |
| 0.11976                | 0.19514     | 0.00681       | 0.00321      | 0.04408      | 0.00236         | 0.03630        | 0.03093 |
| 0.16729                | 0.03325     | 0.00514       | 0.00175      | 0.04690      | 0.00480         | 0.05867        | 0.07132 |
| 0.01891                | 0.07951     | 0.00084       | 0.00780      | 0.00670      | 0.03177         | 0.00516        | 0.04922 |
| 0.04607                | 0.04343     | 0.00490       | 0.00096      | 0.01236      | 0.00258         | 0.03712        | 0.04145 |
| Glutamate              |             |               |              |              |                 |                |         |
| P value                |             |               |              |              |                 |                |         |
| 0.54452                |             |               |              |              |                 |                |         |
| 0.04506                |             |               |              |              |                 |                |         |
| 0.00512                |             |               |              |              |                 |                |         |
| 0.08640                |             |               |              |              |                 |                |         |
| 0.02440                |             |               |              |              |                 |                |         |
| 0.00589                |             |               |              |              |                 |                |         |

| <b>Figure 3</b>                                 |            |              |         |                    |
|-------------------------------------------------|------------|--------------|---------|--------------------|
| <b>3B Cortical Neuron Fluorescent Intensity</b> |            |              |         |                    |
| Uncorrected Fisher's LSD                        | Mean Diff. | Significant? | Summary | Individual P Value |
| CTRL vs. Glut                                   | -1.675     | Yes          | ****    | < 0.0001           |
| CTRL vs. Glut + MK801                           | -0.3317    | No           | ns      | 0.1637             |
| CTRL vs. Glut + NBQX                            | -0.756     | Yes          | **      | 0.0016             |
| CTRL vs. Glut + Both                            | -0.3137    | No           | ns      | 0.1877             |
| CTRL vs. AMPA                                   | -0.7414    | Yes          | **      | 0.002              |
| CTRL vs. AMPA + NBQX                            | -0.4517    | No           | ns      | 0.0583             |
| CTRL vs. NMDA                                   | -0.9967    | Yes          | ****    | < 0.0001           |
| CTRL vs. NMDA + MK801                           | -0.165     | No           | ns      | 0.4876             |
| CTRL vs. HC                                     | -1.241     | Yes          | ****    | < 0.0001           |

|                                     |            |              |         |                    |
|-------------------------------------|------------|--------------|---------|--------------------|
| CTRL vs. HC + both                  | -0.454     | No           | ns      | 0.057              |
|                                     |            |              |         |                    |
|                                     |            |              |         |                    |
| <b>3B iMN Fluorescent Intensity</b> |            |              |         |                    |
| Uncorrected Fisher's LSD            | Mean Diff. | Significant? | Summary | Individual P Value |
|                                     |            |              |         |                    |
| CTRL vs. Glut                       | -1.591     | Yes          | ****    | < 0.0001           |
| CTRL vs. Glut + MK801               | -0.4672    | No           | ns      | 0.1787             |
| CTRL vs. Glut + NBQX                | -1.002     | Yes          | **      | 0.0044             |
| CTRL vs. Glut + Both                | -0.5446    | No           | ns      | 0.1175             |
| CTRL vs. AMPA                       | -0.7702    | Yes          | *       | 0.0275             |
| CTRL vs. AMPA + NBQX                | -0.6216    | No           | ns      | 0.0744             |
| CTRL vs. NMDA                       | -1.352     | Yes          | ***     | 0.0001             |
| CTRL vs. NMDA + MK801               | -0.5842    | No           | ns      | 0.0933             |
| CTRL vs. HC                         | -1.1       | Yes          | **      | 0.0018             |
| CTRL vs. HC + both                  | -0.3176    | No           | ns      | 0.3598             |

|                                     |            |                    |              |         |
|-------------------------------------|------------|--------------------|--------------|---------|
| <b>Figure 4</b>                     |            |                    |              |         |
| <b>4C Fluorescent Intensity</b>     |            |                    |              |         |
| Dunnett's multiple comparisons test | Mean Diff. | 95% CI of diff.    | Significant? | Summary |
|                                     |            |                    |              |         |
| No Stim vs. Low Stim                | -0.005654  | -0.2833 to 0.2720  | No           | ns      |
| No Stim vs. Med Stim                | -0.6513    | -0.9226 to -0.3800 | Yes          | ****    |
| No Stim vs. High Stim               | -0.5418    | -0.8094 to -0.2741 | Yes          | ****    |

|                                                                                                   |            |              |         |                    |
|---------------------------------------------------------------------------------------------------|------------|--------------|---------|--------------------|
| <b>Figure 5/Figure EV5</b>                                                                        |            |              |         |                    |
| <b>Figure 5A and Figure EV5B p-eif2<math>\alpha</math>/eif2<math>\alpha</math> protein levels</b> |            |              |         |                    |
| Uncorrected Fisher's LSD                                                                          | Mean Diff. | Significant? | Summary | Individual P Value |
|                                                                                                   |            |              |         |                    |
| CTRL vs. TG                                                                                       | -0.6357    | Yes          | *       | 0.0384             |
| CTRL vs. Mena                                                                                     | -1.323     | Yes          | ***     | 0.0001             |
| CTRL vs. SSP                                                                                      | -0.9846    | Yes          | **      | 0.0023             |
| CTRL vs. Diamide                                                                                  | -0.9271    | Yes          | **      | 0.0038             |
| CTRL vs. CytoD                                                                                    | -0.1262    | No           | ns      | 0.6686             |
| CTRL vs. MS 275                                                                                   | -0.8677    | Yes          | **      | 0.0062             |
| CTRL vs. Etoposide                                                                                | -1.102     | Yes          | ***     | 0.0008             |
| CTRL vs. Lepto B                                                                                  | -1.229     | Yes          | ***     | 0.0003             |
| CTRL vs. HC                                                                                       | -0.635     | Yes          | *       | 0.0386             |
| CTRL vs. NaArs                                                                                    | -0.8602    | Yes          | **      | 0.0066             |
| CTRL vs. TM                                                                                       | -0.735     | Yes          | *       | 0.0181             |
| CTRL vs. Glut                                                                                     | -0.7169    | Yes          | *       | 0.0209             |
|                                                                                                   |            |              |         |                    |
|                                                                                                   |            |              |         |                    |



| <b>Figure 5A and Figure EV5B PERK protein levels</b> |            |              |         |                    |
|------------------------------------------------------|------------|--------------|---------|--------------------|
| Uncorrected Fisher's LSD                             | Mean Diff. | Significant? | Summary | Individual P Value |
| CTRL vs. TG                                          | -1.458     | Yes          | **      | 0.0011             |
| CTRL vs. Mena                                        | -1.795     | Yes          | ***     | 0.0001             |
| CTRL vs. SSP                                         | -0.8227    | Yes          | *       | 0.0485             |
| CTRL vs. Diamide                                     | -1.433     | Yes          | **      | 0.0013             |
| CTRL vs. CytoD                                       | -0.8531    | Yes          | *       | 0.0413             |
| CTRL vs. MS 275                                      | -1.231     | Yes          | **      | 0.0046             |
| CTRL vs. Etoposide                                   | -1.632     | Yes          | ***     | 0.0004             |
| CTRL vs. Lepto B                                     | -1.439     | Yes          | **      | 0.0012             |
| CTRL vs. HC                                          | -1.59      | Yes          | ***     | 0.0005             |
| CTRL vs. NaArs                                       | -1.41      | Yes          | **      | 0.0015             |
| CTRL vs. TM                                          | -1.649     | Yes          | ***     | 0.0003             |
| CTRL vs. Glut                                        | -1.207     | Yes          | **      | 0.0054             |
|                                                      |            |              |         |                    |
|                                                      |            |              |         |                    |
| <b>Figure 5A and Figure EV5B ATF4 protein levels</b> |            |              |         |                    |
| Uncorrected Fisher's LSD                             | Mean Diff. | Significant? | Summary | Individual P Value |
| CTRL vs. TG                                          | -0.9352    | Yes          | ***     | 0.0006             |
| CTRL vs. Mena                                        | -1.082     | Yes          | ***     | 0.0001             |
| CTRL vs. SSP                                         | -0.52      | Yes          | *       | 0.0378             |
| CTRL vs. Diamide                                     | -0.551     | Yes          | *       | 0.0285             |
| CTRL vs. CytoD                                       | -0.495     | Yes          | *       | 0.0472             |
| CTRL vs. MS 275                                      | -1.532     | Yes          | ****    | < 0.0001           |
| CTRL vs. Etoposide                                   | -0.6106    | Yes          | *       | 0.0162             |
| CTRL vs. Lepto B                                     | -0.9276    | Yes          | ***     | 0.0006             |
| CTRL vs. HC                                          | -1.085     | Yes          | ***     | 0.0001             |
| CTRL vs. NaArs                                       | -1.189     | Yes          | ****    | < 0.0001           |
| CTRL vs. TM                                          | -0.6481    | Yes          | *       | 0.0113             |
| CTRL vs. Glut                                        | -0.5156    | Yes          | *       | 0.0393             |

| <b>Figure 6</b>                                            |            |              |         |                    |
|------------------------------------------------------------|------------|--------------|---------|--------------------|
| <b>Figure 6A NSC34 RAN Inhibitor Fluorescent Intensity</b> |            |              |         |                    |
| Uncorrected Fisher's LSD                                   | Mean Diff. | Significant? | Summary | Individual P Value |
| Condition vs. +PERK                                        | 0.2211     | Yes          | ***     | 0.0007             |
| Condition vs. +CX5461                                      | -0.09105   | No           | ns      | 0.1572             |
| Condition vs. +Sal                                         | -0.07155   | No           | ns      | 0.2657             |
| Condition vs. +Cerca                                       | 0.1871     | Yes          | **      | 0.004              |
| Condition vs. +Metf                                        | -0.00205   | No           | ns      | 0.9745             |

|                                                                      |            |              |         |                    |
|----------------------------------------------------------------------|------------|--------------|---------|--------------------|
| Condition vs. +Traz                                                  | 0.2383     | Yes          | ***     | 0.0003             |
| Condition vs. +1,3DBM                                                | 0.2794     | Yes          | ****    | < 0.0001           |
|                                                                      |            |              |         |                    |
|                                                                      |            |              |         |                    |
| <b>Figure 6B Cortical Neuron RAN Inhibitor Fluorescent Intensity</b> |            |              |         |                    |
| Uncorrected Fisher's LSD                                             | Mean Diff. | Significant? | Summary | Individual P Value |
|                                                                      |            |              |         |                    |
| Glutamate vs. +PERKi                                                 | 0.322      | No           | ns      | 0.0951             |
| Glutamate vs. +CX5461                                                | 0.0499     | No           | ns      | 0.7689             |
| Glutamate vs. +Sal                                                   | -0.1081    | No           | ns      | 0.5601             |
| Glutamate vs. +Cerca                                                 | 0.1317     | No           | ns      | 0.4831             |
| Glutamate vs. +Metf                                                  | 0.04175    | No           | ns      | 0.8292             |
| Glutamate vs. +Traz                                                  | 0.5144     | Yes          | **      | 0.005              |
| Glutamate vs. +1,3DBM                                                | 0.5965     | Yes          | ***     | 0.0005             |
