# Supplementary material for: Repeat‐associated non‐AUG translation in C9orf72‐ALS/FTD is driven by neuronal excitation and stress
Source: PubMed Central journal article supplement (PMC6365928; doi:10.15252/emmm.201809423), 2019-01-07
Supplement: EMMM-11-e9423-s003.pdf [file EMMM-11-e9423-s003.pdf]

| Condition    | Slope    | Y-intercept | Equation (y = value related to max; x = time) | Actual Value @ 108hrs | Predicted Value @ 108 hrs | Predicted Half-Life (value=0.5) |
|--------------|----------|-------------|-----------------------------------------------|-----------------------|---------------------------|---------------------------------|
| GA Diffuse   | -0.00194 | 0.9698      | $y = -0.00194x + 0.9698$                      | 0.789                 | 0.760                     | 242.16 hrs                      |
| GA Aggregate | -0.00127 | 0.9724      | $y = -0.00127x + 0.9724$                      | 0.865                 | 0.835                     | 371.97 hrs                      |
| GP           | -0.0025  | 0.9751      | $y = -0.00250x + 0.9751$                      | 0.689                 | 0.705                     | 190.04 hrs                      |
| GR Cytoplasm | -0.00235 | 0.9855      | $y = -0.00235x + 0.9855$                      | 0.763                 | 0.732                     | 206.60 hrs                      |
| GR Nucleus   | -0.00171 | 0.9827      | $y = -0.00171x + 0.9827$                      | 0.815                 | 0.798                     | 282.28 hrs                      |
| PA           | -0.00232 | 0.9683      | $y = -0.00232x + 0.9683$                      | 0.746                 | 0.718                     | 201.85 hrs                      |
| PG           | -0.00287 | 0.9639      | $y = -0.00287x + 0.9639$                      | 0.716                 | 0.654                     | 161.64 hrs                      |
| PR           | -0.00166 | 0.9881      | $y = -0.00166x + 0.9881$                      | 0.834                 | 0.809                     | 294.04 hrs                      |

Table EV1. Calculations of DPR half-life using longitudinal fluorescent imaging quantification of photoconverted DPR decay over 108 hrs.

Quantification of photoconverted DPR fluorescent intensity was plotted over 108 hrs (see Figure EV5). The slope and y-intercept for each condition was calculated and used to generate a slope-intercept form equation for each condition. The equation was validated for accuracy by comparing predicted value at 108 hrs to the actual value measured. Through this equation, a predicted half-life was calculated by setting fluorescent intensity level (y) to 0.5. Predicted half-life values demonstrate long lived DPRs that are dependent on localization and granularity of each species.
