# Supplementary material for: Repeat‐associated non‐AUG translation in C9orf72‐ALS/FTD is driven by neuronal excitation and stress
Source: PubMed Central journal article supplement (PMC6365928; doi:10.15252/emmm.201809423), 2019-01-07
Supplement: EMMM-11-e9423-s004.pdf [file EMMM-11-e9423-s004.pdf]

| Stressor        | Stress Type                        | DPR50 ( $\mu\text{M}$ ) | Used in Future Experiments | Notes                                                                           |
|-----------------|------------------------------------|-------------------------|----------------------------|---------------------------------------------------------------------------------|
| Thapsigargin    | ER stress                          | 0.960                   | Y – 1 $\mu\text{M}$        | in DMSO                                                                         |
| Tunicamycin     | ER stress                          | 1.340                   | Y – 1 $\mu\text{M}$        | in DMSO                                                                         |
| Allyl Alcohol   | Oxidative Stress                   | 2.990                   | N                          | Highly toxic at higher doses; higher fluorescence background                    |
| Menadione       | Oxidative Stress                   | 2.310                   | Y – 2 $\mu\text{M}$        | Toxic at higher doses; high fluorescence background; reliable induction of RANT |
| Bromobenzene    | Oxidative Stress                   | 3.570                   | N                          | Induction of RAN translation highly variable, not reliable                      |
| Staurosporine   | Oxidative Stress                   | 0.008                   | Y – .01 $\mu\text{M}$      | in DMSO                                                                         |
| Diamide         | Oxidative Stress                   | 3.070                   | Y – 3 $\mu\text{M}$        | in DMSO                                                                         |
| H2O2            | Oxidative Stress                   | 6.810                   | N                          |                                                                                 |
| MS-275          | HDAC inhibitor                     | 0.830                   | Y – 1 $\mu\text{M}$        | in DMSO                                                                         |
| Leptomycin B    | Nuclear Export Inhibitor           | 0.640                   | Y – 1 $\mu\text{M}$        |                                                                                 |
| Homocysteine    | Excitotoxicity/ER stress           | 0.760                   | Y – 1 $\mu\text{M}$        | Very reliable induction of RANT                                                 |
| Glutamate       | Excitotoxicity                     | 2.570                   | Y – 5 $\mu\text{M}$        | Very reliable induction of RANT                                                 |
| KCl             | Excitotoxicity/Other               | 2.550                   | N                          | Mode of RANT induction unclear (excitotoxic vs other mechanism)                 |
| Etoposide       | Multiple (ER/Oxidative/Apoptosis)  | 1.890                   | Y – 5 $\mu\text{M}$        | in DMSO                                                                         |
| Paraquat        | Oxidative Stress/Apoptotic         | 2.530                   | N                          | Highly toxic to cells                                                           |
| Cytochalasin D  | Cytoskeleton Disruption/Apoptotic  | 3.850                   | Y – 5 $\mu\text{M}$        | Toxic at higher doses                                                           |
| Sodium Arsenite | Stress Granule Induction/Oxidative | 0.047                   | Y – .05 $\mu\text{M}$      | in DMSO                                                                         |

Table EV2. Characterization of individual stressors used to increase non-AUG translation and their EC50 values.

A wide range of cellular stressors were applied to NSC34 in a dose dependent manner and assessed for increases in frequency of non-AUG dependent DPR translation (see Figure EV6). Listed is the cellular stressor used, the type of cell stress, and the EC50 value of the increase in frequency of non-AUG translation. Also listed is whether these stressors were utilized in future experiments and well as any notes relevant to the use of the stressor.
