# Supplementary material for: Repeat‐associated non‐AUG translation in C9orf72‐ALS/FTD is driven by neuronal excitation and stress
Source: PubMed Central journal article supplement (PMC6365928; doi:10.15252/emmm.201809423), 2019-01-07

**Figure 1B and EV1B – Representative Filter Trap Assays**

Anti-HA: Figure 1B and EV1B

Order of sample – GA, GP, GR, PA, PG, PR

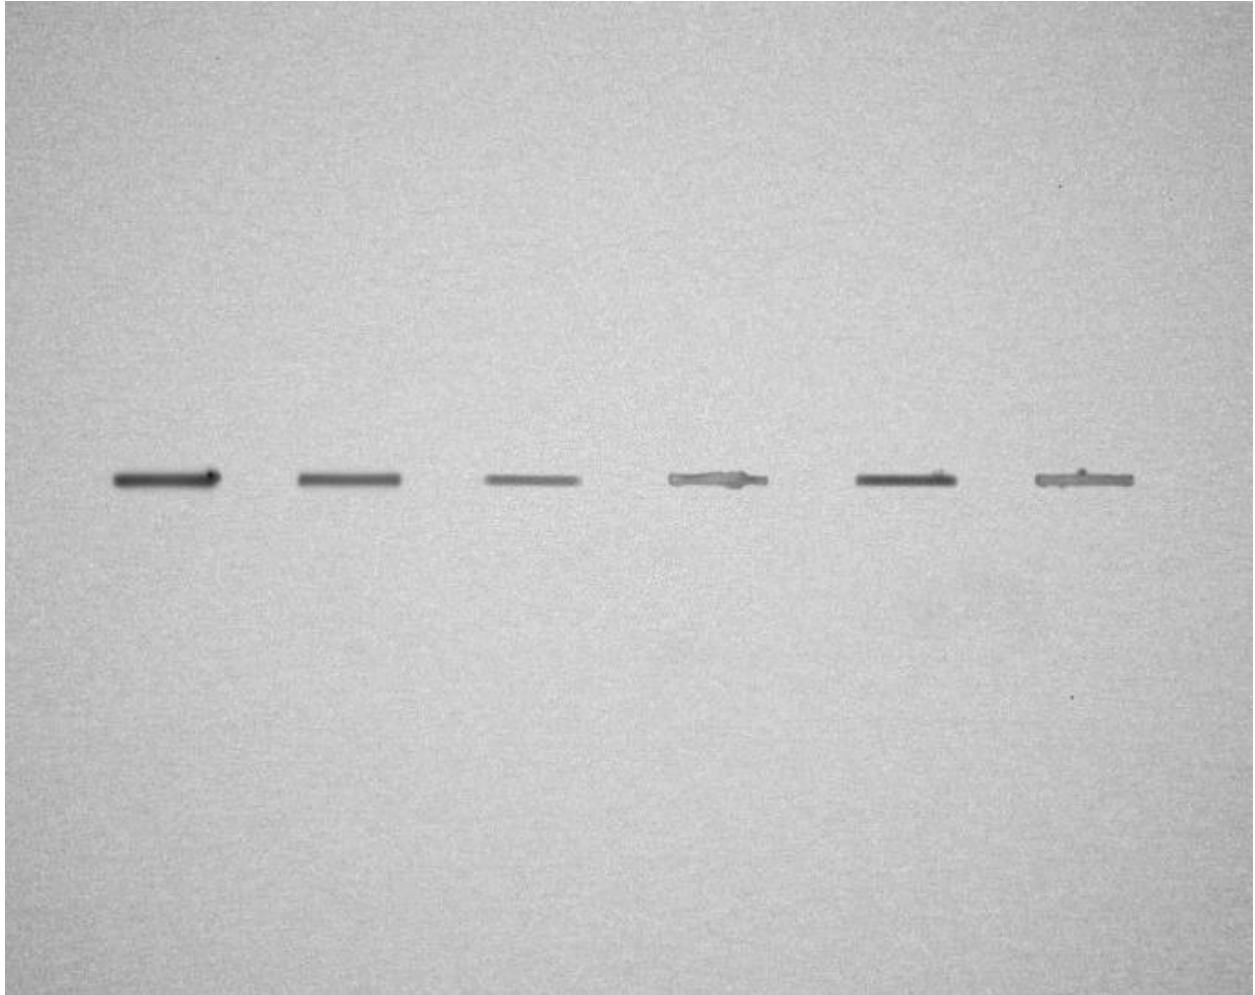

Anti-GAPDH: Figure 1B and EV1B

Same order as above

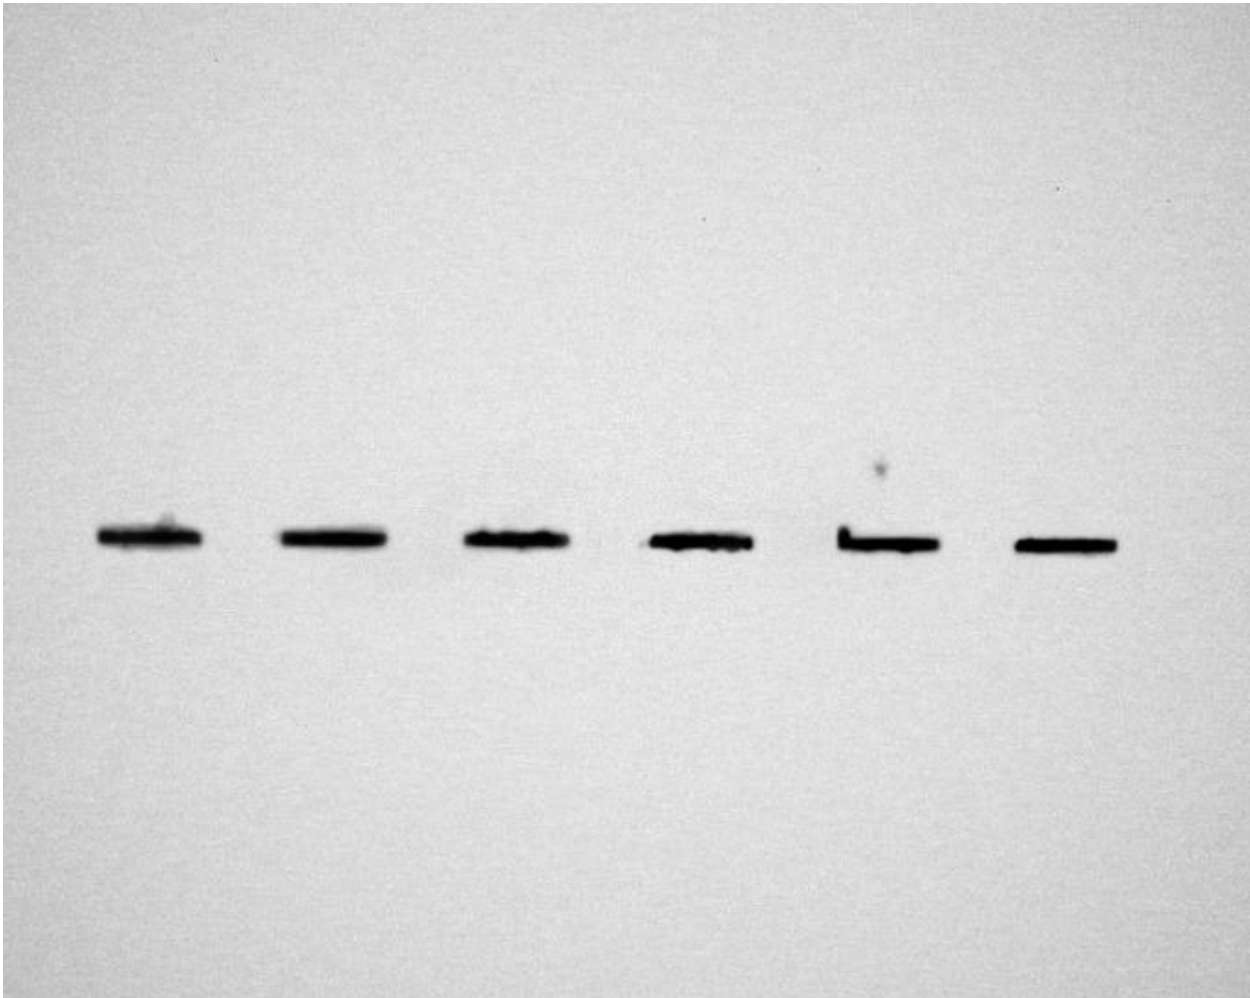

Pre-processed Images

GA-188

GP-188

GR-188

PA-188

PG-188

PR-188

Dendra2

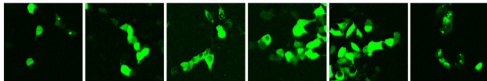

NES-mIFP

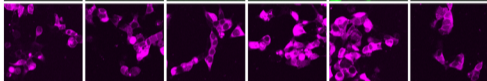

Post-processed Images

Dendra2

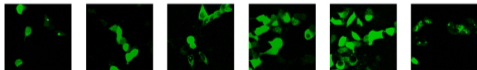

Merged

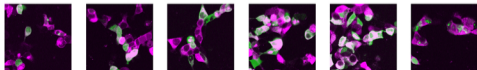

Supplement: EMMM-11-e9423-s006.pdf [file EMMM-11-e9423-s006.pdf]
