# Supplementary material for: Repeat‐associated non‐AUG translation in C9orf72‐ALS/FTD is driven by neuronal excitation and stress
Source: PubMed Central journal article supplement (PMC6365928; doi:10.15252/emmm.201809423), 2019-01-07

eif2a

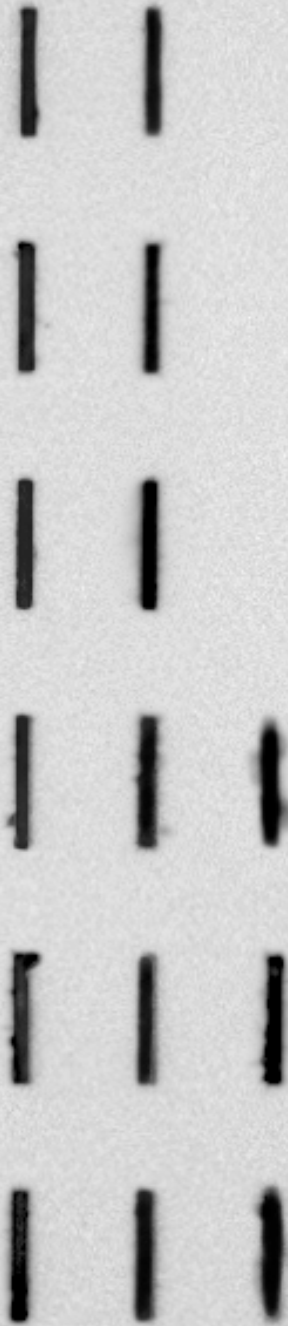

p-eif2a

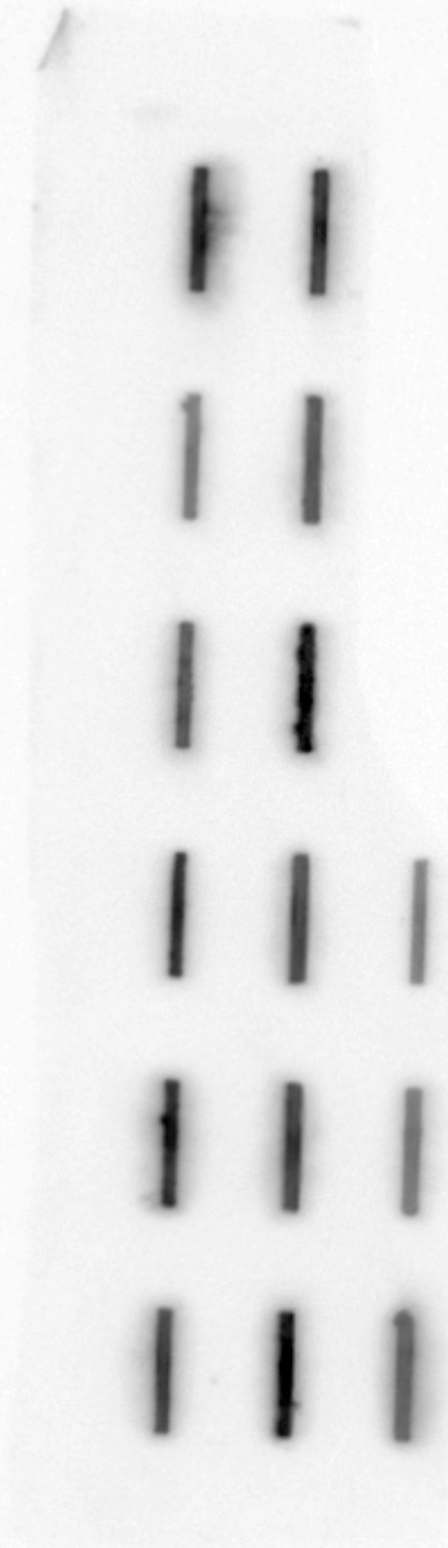

PERK

11

11

11

111

111

111

ATF4

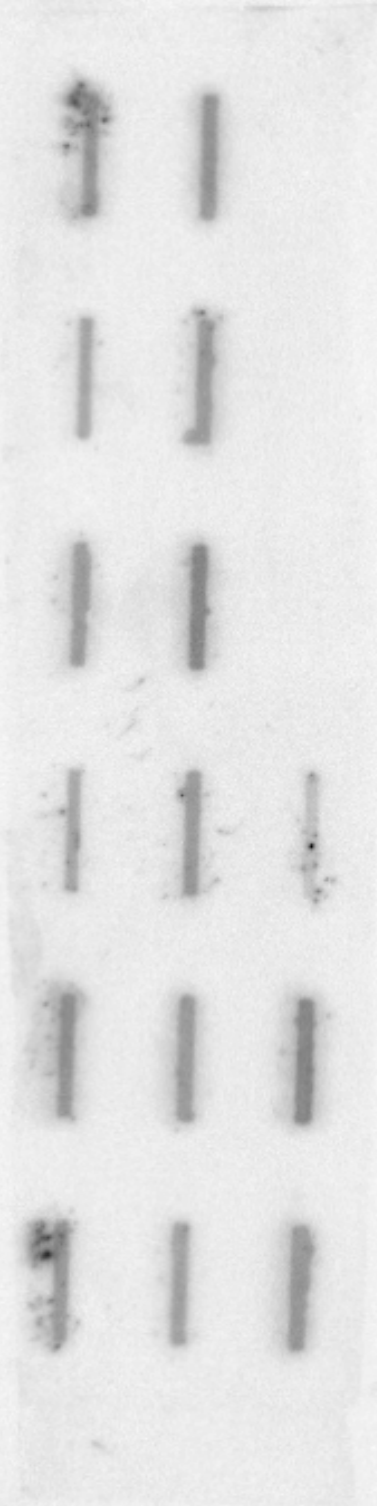

GAPDH

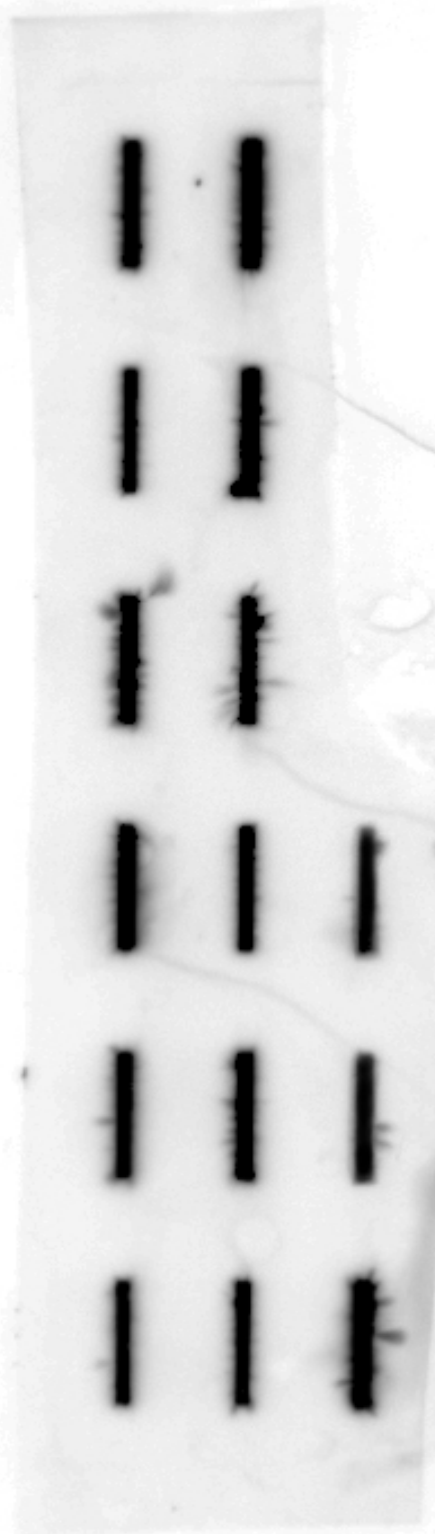

Supplement: EMMM-11-e9423-s008.pdf [file EMMM-11-e9423-s008.pdf]
