# Supplementary material for: Repeat‐associated non‐AUG translation in C9orf72‐ALS/FTD is driven by neuronal excitation and stress
Source: PubMed Central journal article supplement (PMC6365928; doi:10.15252/emmm.201809423), 2019-01-07

**Figure 5A and EV5A - Representative blots used in figures that have correct order of conditions** Flg 5 - anti-P-eif2 $\alpha$  Filter Trap Assay

Line 1 - TG through MS275

Line 2 - Etop through Glut

Line 3 - EV5 HEK, CTRL/ EV5 NSC34, EV5 Neuron

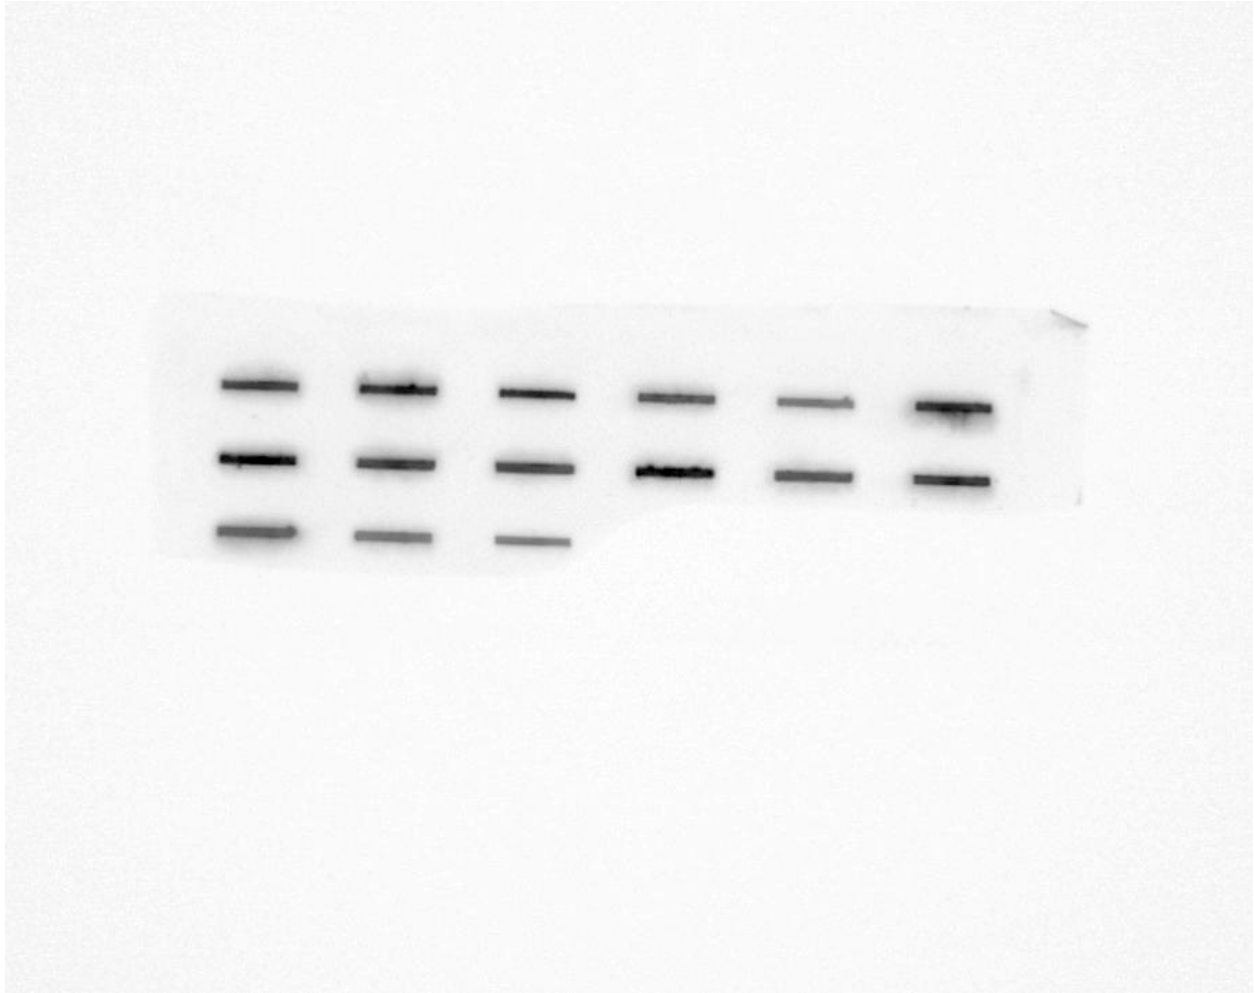

Fig 5 - anti-eif2 $\alpha$  Filter Trap Assay

Line 1 - TG through MS275

Line 2 - Etop through Glut

Line 3 - EV5 HEK, CTRL/ EV5 NSC34, EV5 Neuron

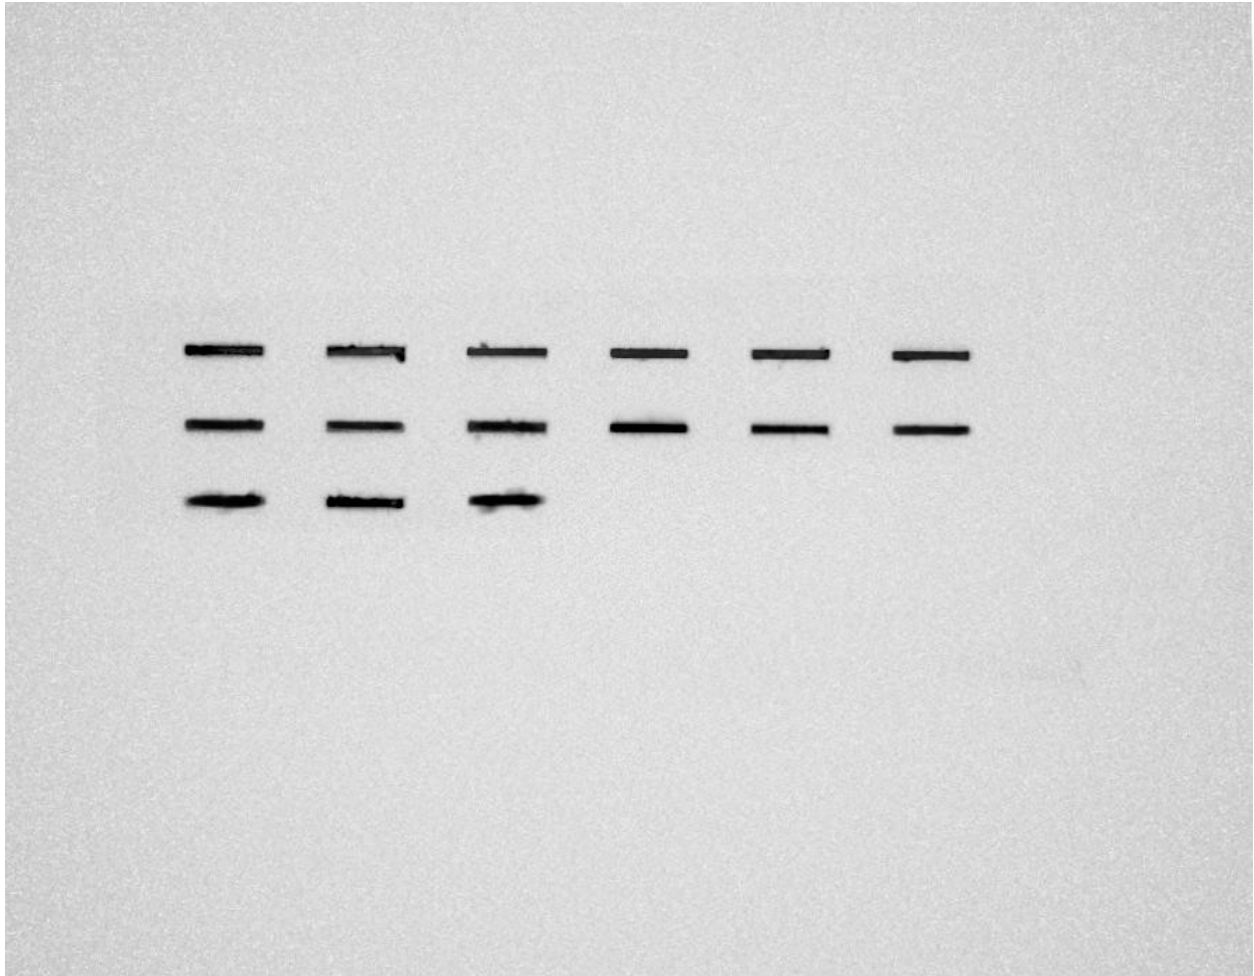

Fig 5 - anti-P-PERK Filter Trap Assay

Line 1 - TG through MS275

Line 2 - Etop through Glut

Line 3 - EV5 Neuron, EV5 HEK, CTRL/ EV5 NSC34

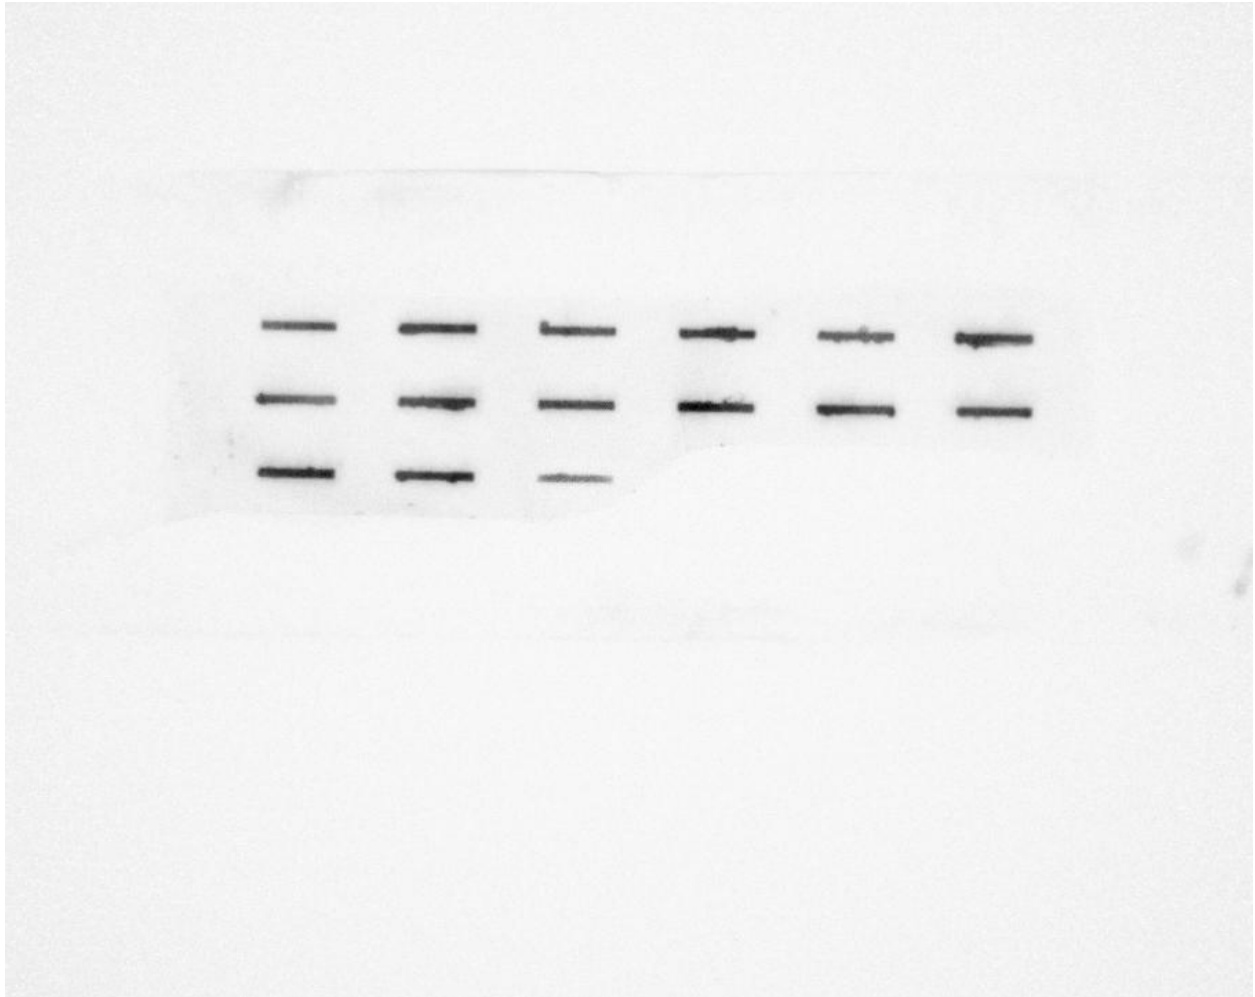

Fig 5 - anti-ATF4 Filter Trap Assay

Line 1 - TG through MS275

Line 2 - Etop through Glut

Line 3 - CTRL/ EV5 NSC34, EV5 HEK, EV5 Neuron

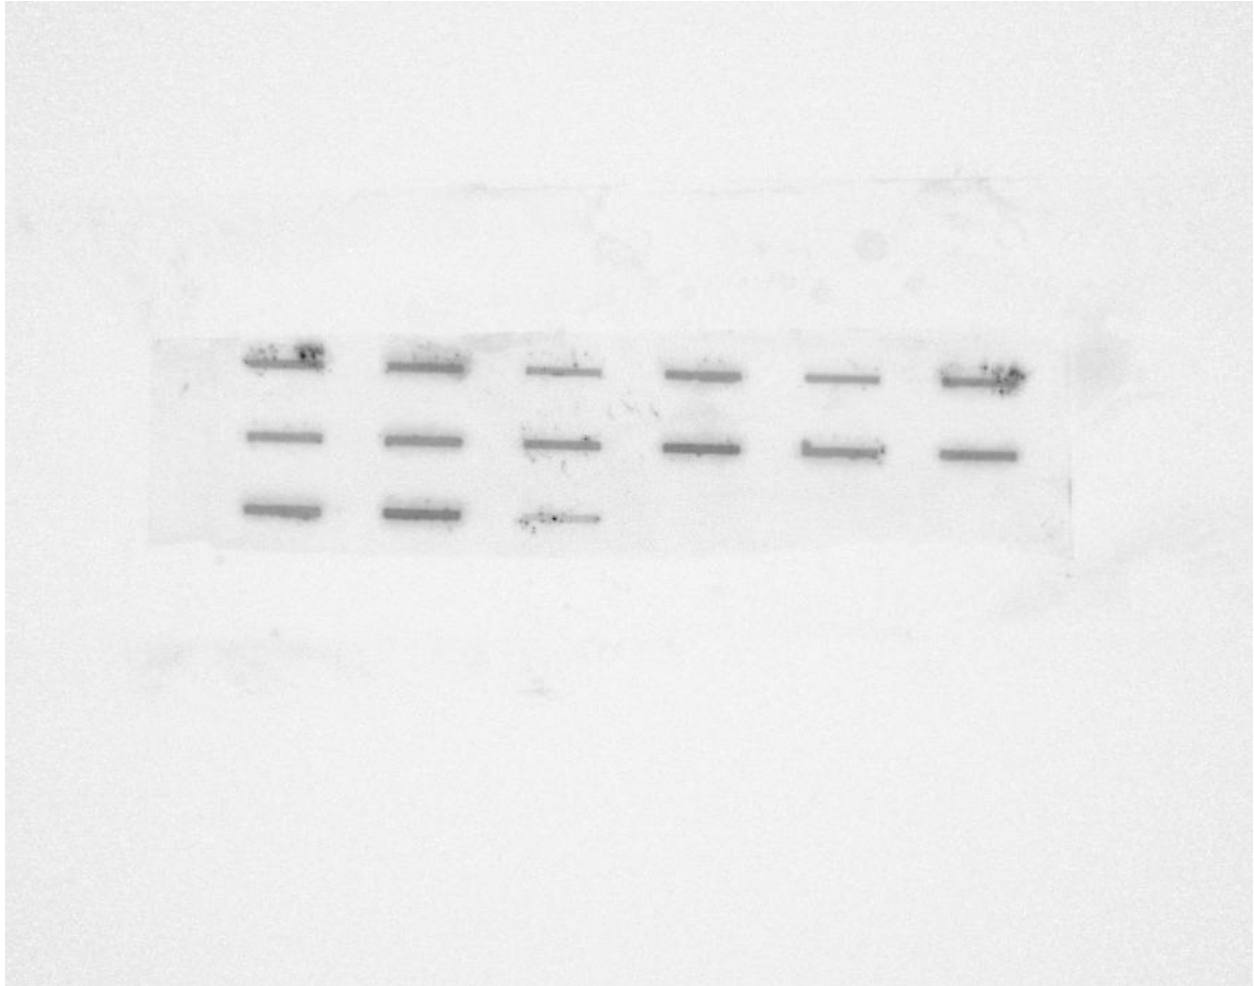

Fig 5 - anti-GAPDH Filter Trap Assay

Line 1 - TG through MS275

Line 2 - Etop through Glut

Line 3 - CTRL/ EV5 NSC34, EV5 HEK, EV5 Neuron

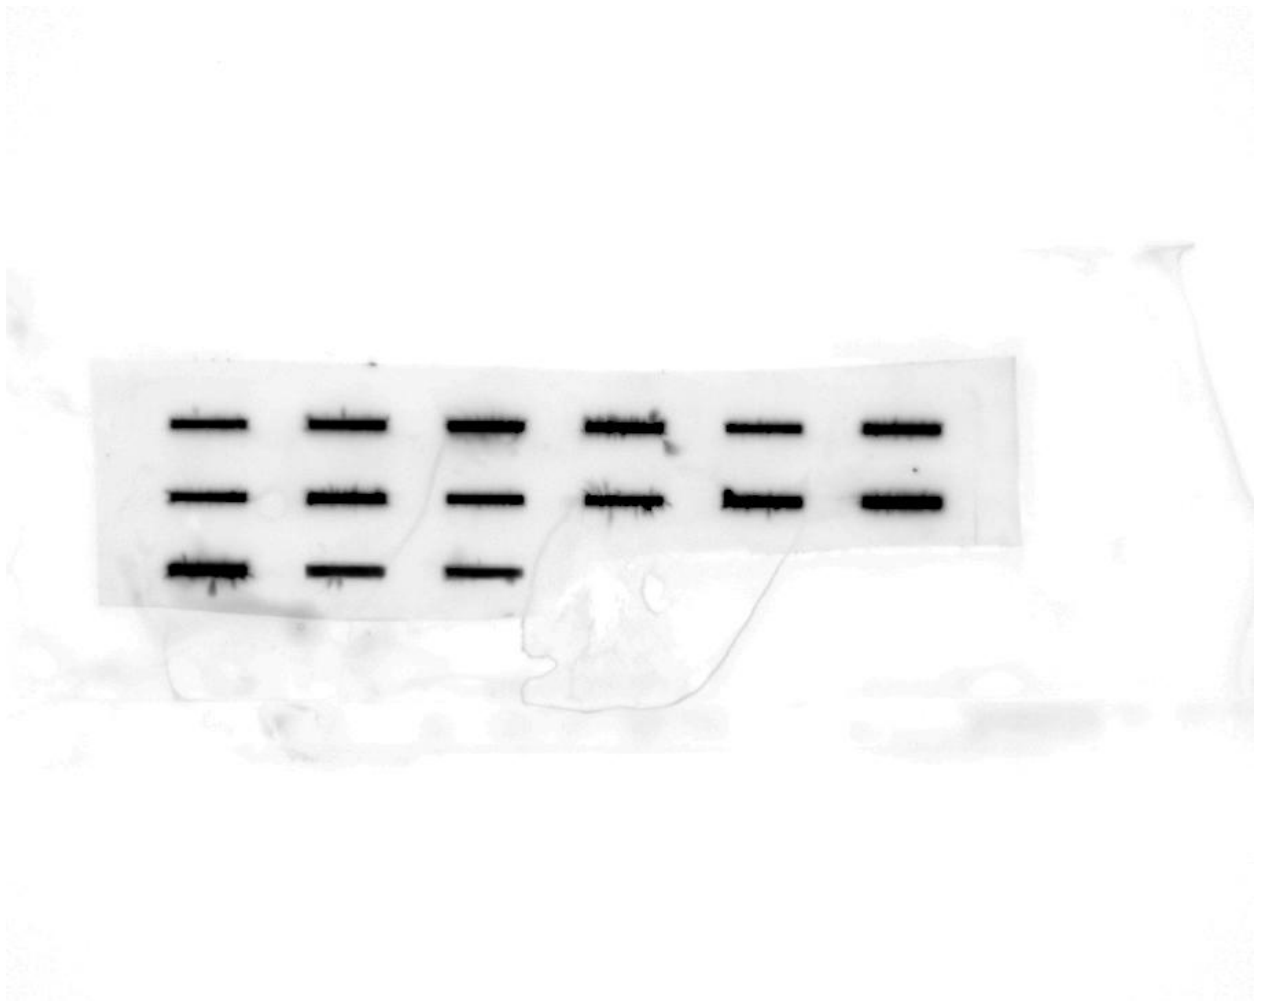

Supplement: EMMM-11-e9423-s009.pdf [file EMMM-11-e9423-s009.pdf]
